# Supplementary figures and images for: The transmembrane adapter SCIMP recruits tyrosine kinase Syk to phosphorylate Toll-like receptors to mediate selective inflammatory outputs
Source: PubMed Central journal article supplement — J Biol Chem. 2022 Mar 22;298(5):101857. doi: 10.1016/j.jbc.2022.101857 (PMC9052152; doi:10.1016/j.jbc.2022.101857), 2022-03-22

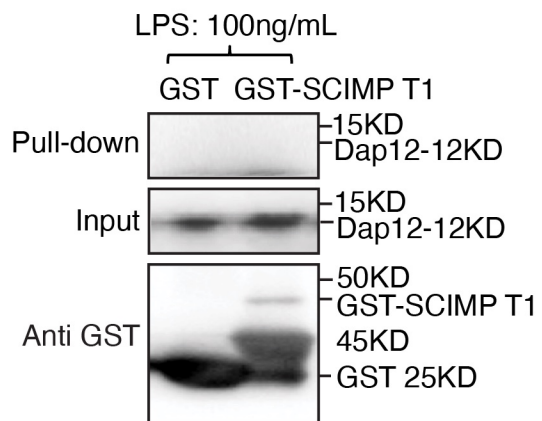

Fig. S1

Supplement: mmc3.pdf [file mmc3.pdf]

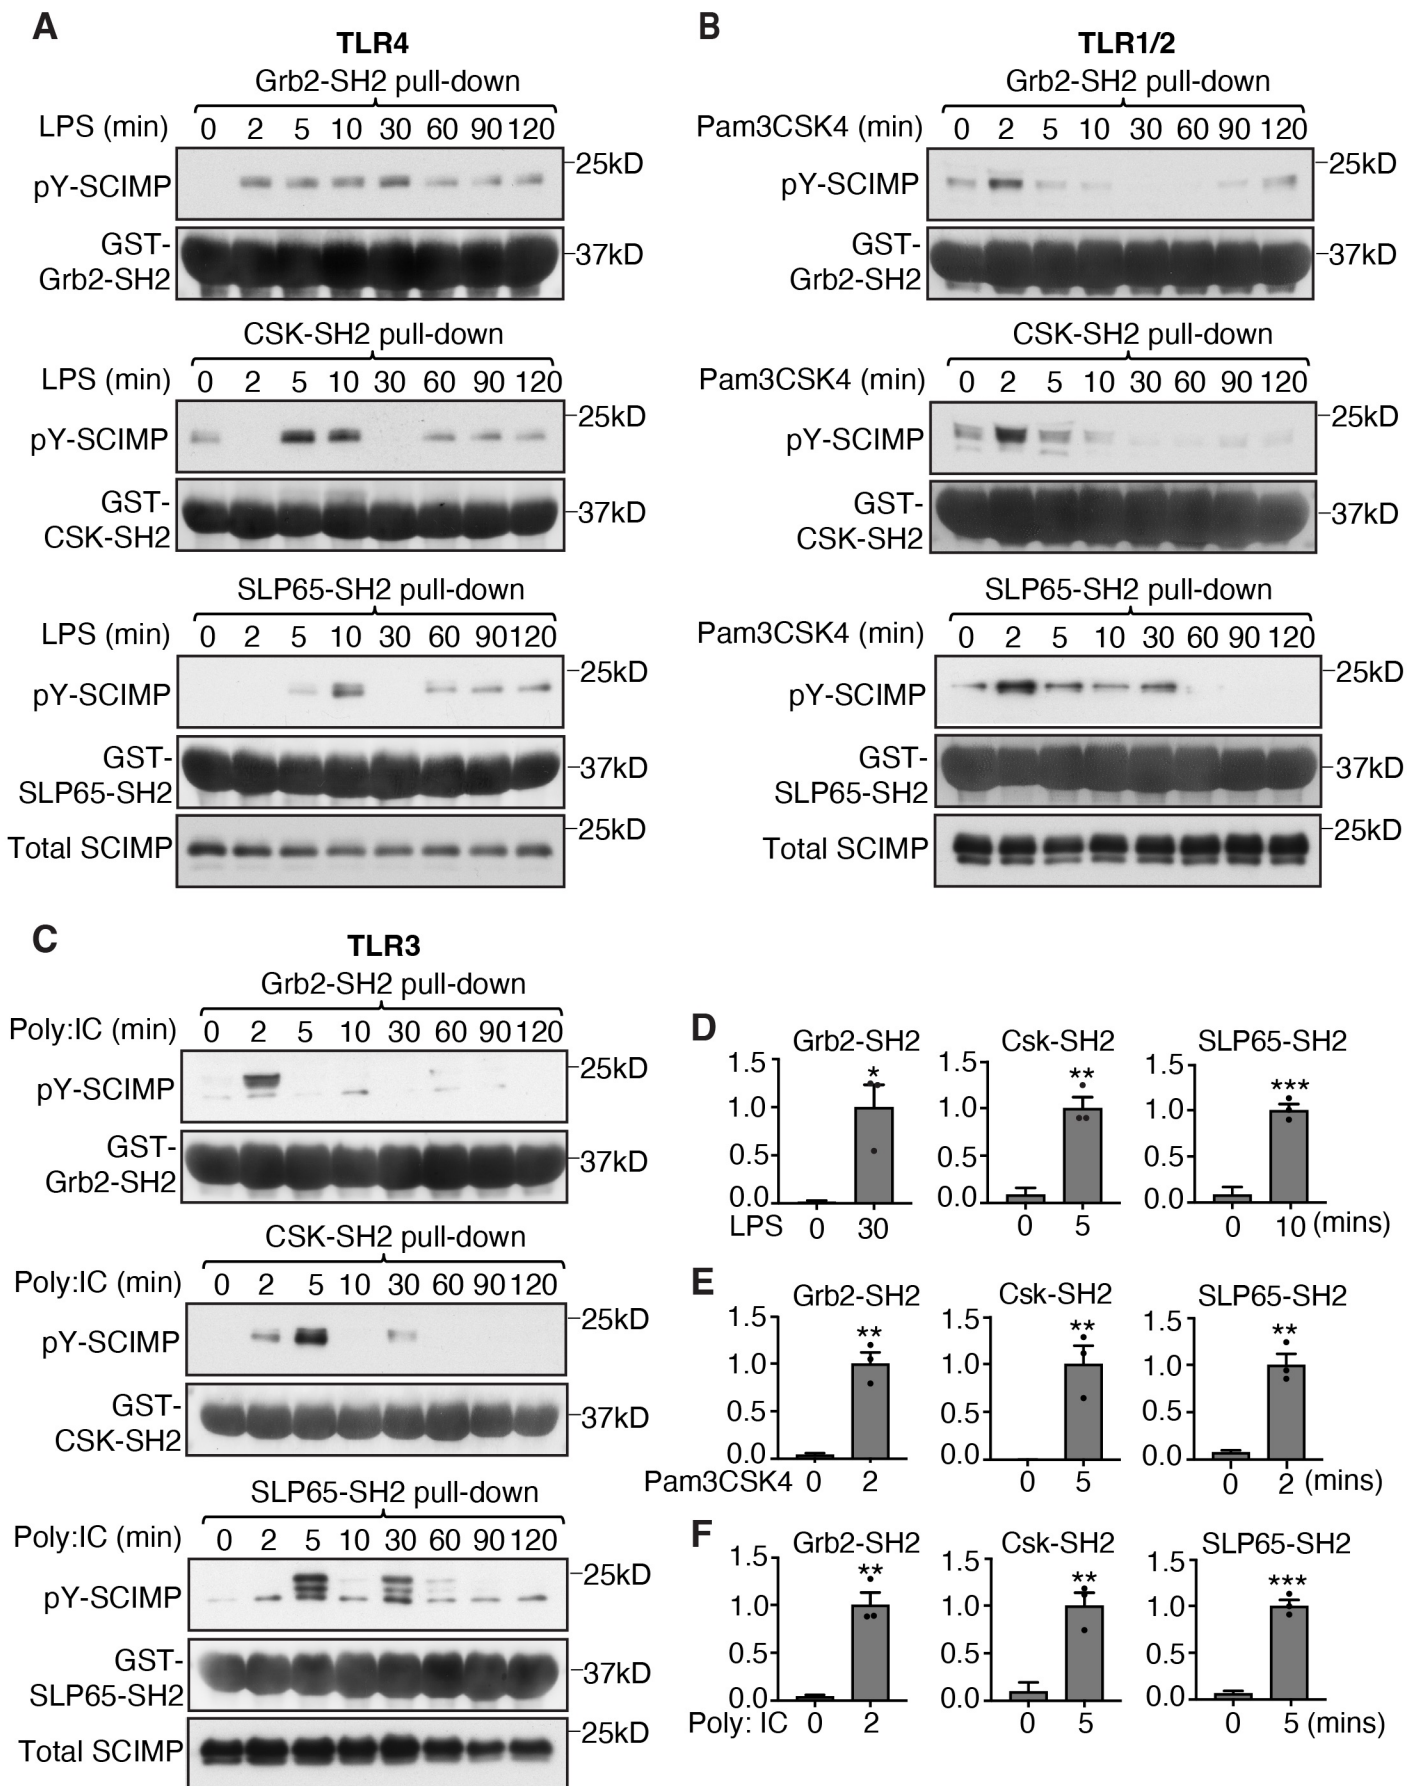

**Fig. S2**

Supplement: mmc4.pdf [file mmc4.pdf]

RAW264.7 expressing SCIMP-V5

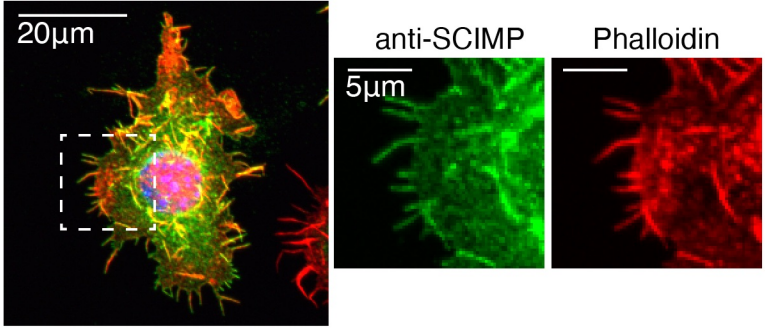

Wild-type RAW264.7

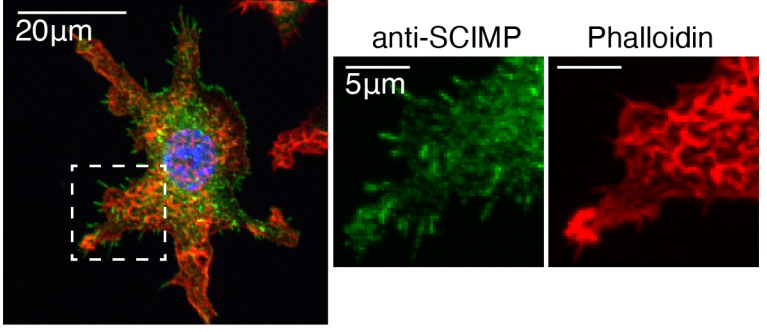

Fig. S3

Supplement: mmc5.pdf [file mmc5.pdf]

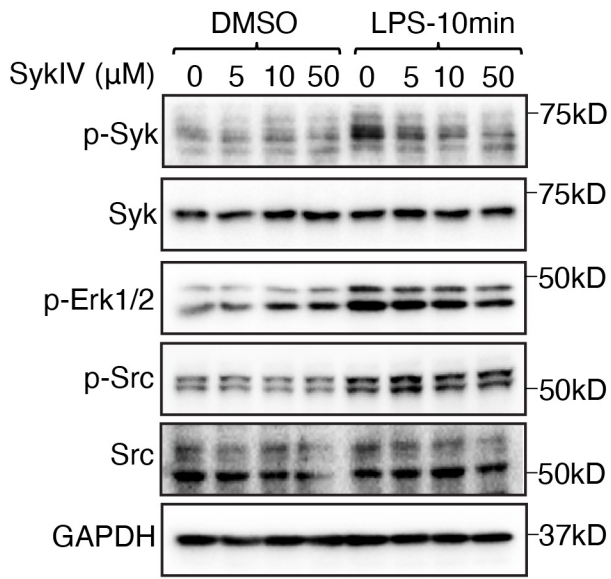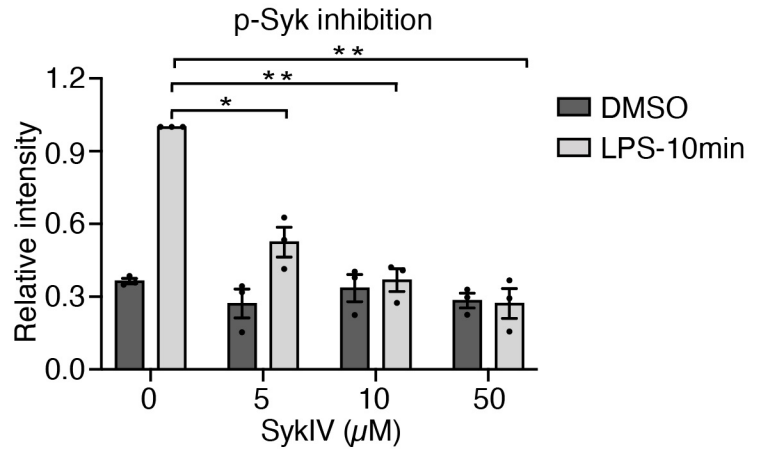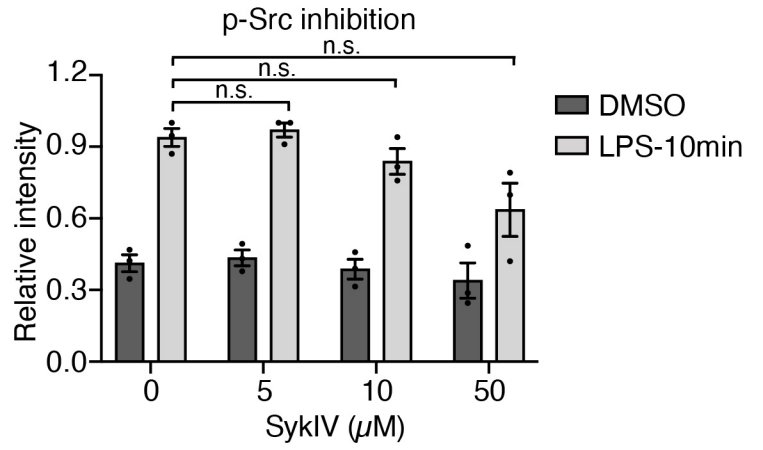

Fig. S4

Supplement: mmc6.pdf [file mmc6.pdf]

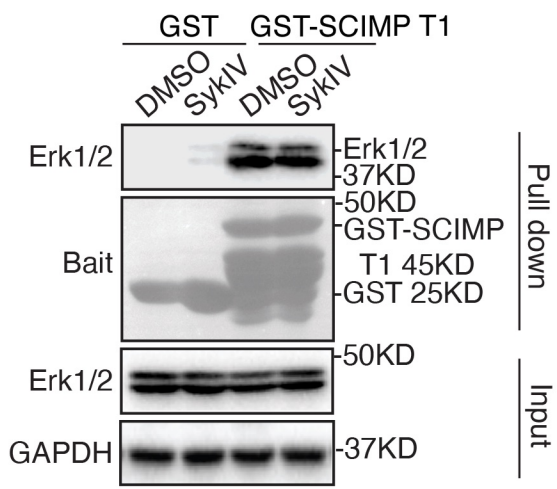

**Fig. S5**

Supplement: mmc7.pdf [file mmc7.pdf]

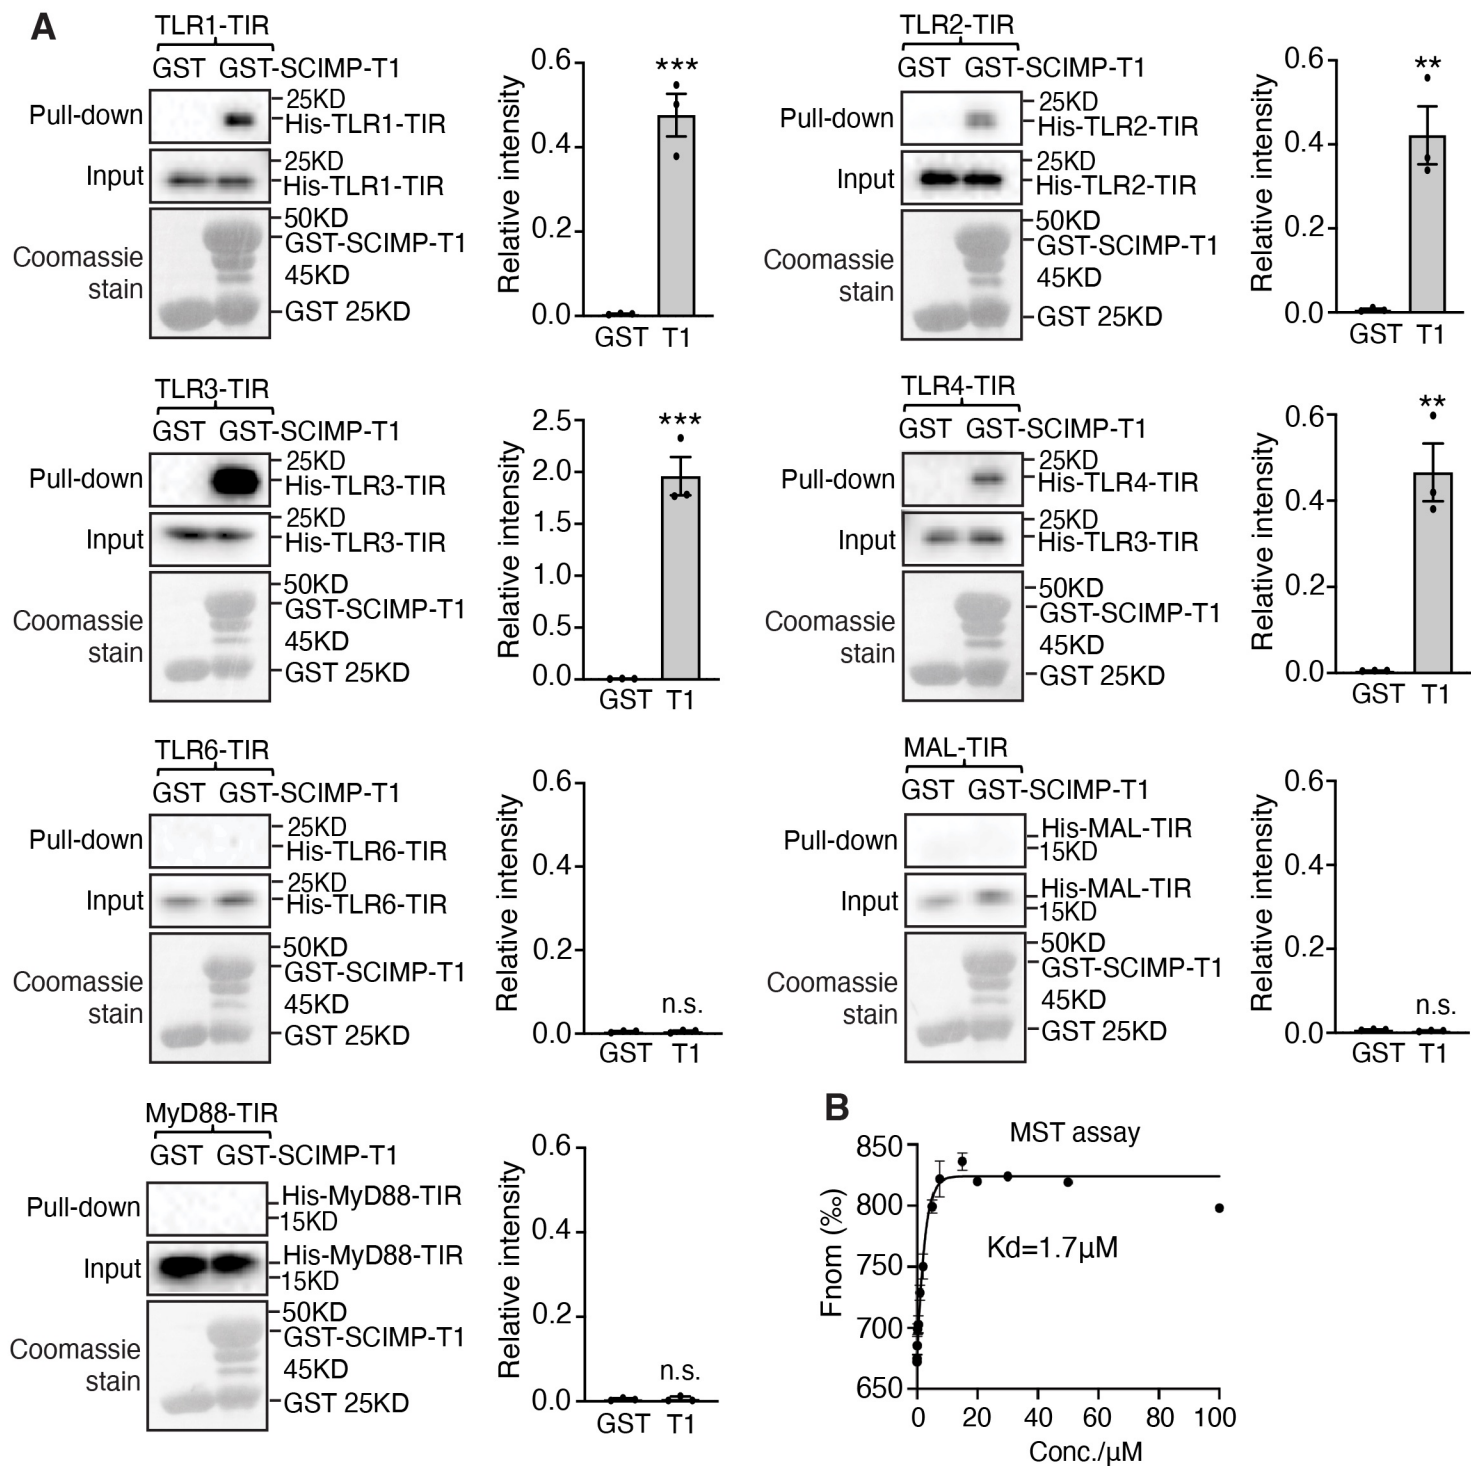

**Fig. S6**

Supplement: mmc8.pdf [file mmc8.pdf]

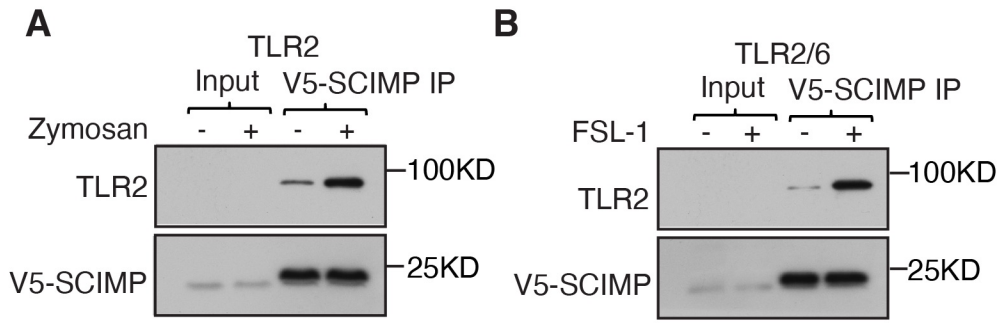

**Fig. S7**

Supplement: mmc9.pdf [file mmc9.pdf]
